# Supplementary material for: Structural and In Vitro Functional Comparability Analysis of Altebrel™, a Proposed Etanercept Biosimilar: Focus on Primary Sequence and Glycosylation
Source: PubMed Central journal article supplement (PMC6469174; doi:10.3390/ph12010014), 2019-01-17
Supplement: pharmaceuticals-12-00014-s001.pdf [file pharmaceuticals-12-00014-s001.pdf]

## Supporting Information

# Structural and In Vitro Functional Comparability Analysis of Altebrel™, a Proposed Etanercept Biosimilar: Focus on Primary Sequence and Glycosylation

Ramin Fazel <sup>1,2,†</sup>, Yudong Guan <sup>2,†</sup>, Behrouz Vaziri <sup>3</sup>, Christoph Krisp <sup>2</sup>, Laura Heikaus <sup>2</sup>, Amirhossein Saadati <sup>4</sup>, Siti Nurul Hidayah <sup>2</sup>, Manasi Gaikwad <sup>2</sup> and Hartmut Schlüter <sup>2,\*</sup>

<sup>1</sup> Department of Biotechnology, College of Science, The University of Tehran, 1417864311 Tehran, Iran; Ramin.Fazel@gmail.com. Ramin.Fazel@ut.ac.ir

<sup>2</sup> Mass Spectrometric Proteomics, Institute of Clinical Chemistry and Laboratory Medicine, Campus Forschung, N27 Raum 00.008, Universitätsklinikum Hamburg-Eppendorf, Martinistr. 52, 20246 Hamburg, Germany; y.guan@uke.de (Y.G.); c.krisp@uke.de (C.K.); l.heikaus@uke.de (L.H.); s.hidayah@uke.de (S.N.H.); m.gaikwad@uke.de (M.G.)

<sup>3</sup> Biotechnology Research Center, Pasteur Institute of Iran, 1316943551 Tehran, Iran; Behrouz-vaziri@pasteur.ac.ir

<sup>4</sup> AryoGen Pharmed, Cross Tajbakhsh Street, 24th Kilometer Makhsous, Tehran, Iran; saadatirada@aryogen.com

\* Correspondence: hschluet@uke.de; Tel.: +49(0)40-7410-58795

† These authors contributed equally to this work.

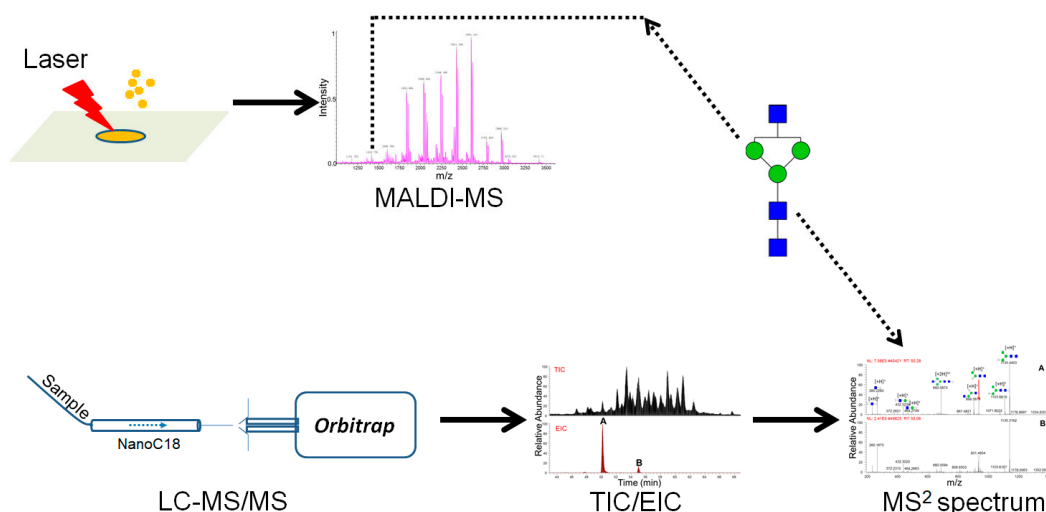

Figure S1: Workflow for the analysis of glycan structures via permethylation

**Figure S2:** Sequence of etanercept with the identified peptides after peptide mapping using the tryptic peptide, deglycosylated tryptic peptide (Deg), LysC and AspN digested peptides in Altebrel-6 is compared. The blank areas show the unidentified peptides by each of the methods. Aspartic acid 235 is the boundary of the TNFr and Fc domains.

|             |                 | 1          | 11         | 21         | 31         | 41         | 51         | 61         | 71         | 81         | 91         |
|-------------|-----------------|------------|------------|------------|------------|------------|------------|------------|------------|------------|------------|
| <b>1</b>    | <b>Sequence</b> | LPAQVAFTPY | APEPGSTCRL | REYYDQTAQM | CCSKCSPGQH | AKVFCTKTS  | TVCDSCEDST | YTQLWNWVPE | CLSCGSRCSS | DQVETQACTR | EQNRICTCRP |
|             | <b>Trypsin</b>  | LPAQVAFTPY | APEPGSTCRL | REYYDQTAQM | CCSKCSPGQH | AKVFCTKTS  | TVCDSCEDST | YTQLWNWVPE | CLSCGSRCSS | DQVETQACTR | ICTCRP     |
|             | <b>Deg+Try</b>  | LPAQVAFTPY | APEPGSTCRL | REYYDQTAQM | CCSKCSPGQH | AKVFCTKTS  | TVCDSCEDST | YTQLWNWVPE | CLSCGSRCSS | DQVETQACTR | EQNRICTCRP |
|             | <b>LysC</b>     | LPAQVAFTPY | APEPGSTCRL | REYYDQTAQM | CCSKCSPGQH | AK         |            |            |            |            |            |
| <b>AspN</b> | LPAQVAFTPY      | APEPGSTCRL | REYYDQTAQM | CCSKCSPGQH | AKVFCTKTS  | DST        | YTQLWNWVPE | CLSCGSRCSS |            |            |            |
| <b>101</b>  | <b>Sequence</b> | GWYCALSKQE | GCRLCAPLRK | CRPGFGVARP | GTETSDVVC  | PCAPGTFSNT | TSSTDICRPH | QICNVVAIPG | NASMDAVCTS | TSPTRSMAPG | AVHLPQPVST |
|             | <b>Trypsin</b>  | GWYCALSKQE | GCRLCAPLRK |            |            |            | PH         | QICNVVAIPG | NASMDAVCTS | TSPTRSMAPG | AVHLPQPVST |
|             | <b>Deg+Try</b>  | GWYCALSKQE | GCRLCAPLRK |            |            |            | PH         | QICNVVAIPG | NASMDAVCTS | TSPTRSMAPG | AVHLPQPVST |
|             | <b>LysC</b>     |            |            | CRPGFGVARP | GTETSDVVC  |            |            |            |            |            |            |
| <b>AspN</b> |                 |            |            | DVVC       | PCAPGTFSNT | TSSTDICRPH | QICNVVAIPG | NASM       |            |            |            |
| <b>201</b>  | <b>Sequence</b> | RSQHTQPTPE | PSTAPSTSFL | LPMGSPPAE  | GSTGDEPKSC | DKTHTCPPCP | APELLGGPSV | FLFPPKPKDT | LMISRTPEVT | CVVVDVSHED | PEVKFNWYVD |
|             | <b>Trypsin</b>  | RSQHTQPTPE | PSTAPSTSFL | LPMGSPPAE  | GSTGDEPKSC | DKTHTCPPCP | APELLGGPSV | FLFPPKPKDT | LMISRTPEVT | CVVVDVSHED | PEVKFNWYVD |
|             | <b>Deg+Try</b>  | RSQHTQPTPE | PSTAPSTSFL | LPMGSPPAE  | GSTGDEPKSC | DKTHTCPPCP | APELLGGPSV | FLFPPKPKDT | LMISRTPEVT | CVVVDVSHED | PEVKFNWYVD |
|             | <b>LysC</b>     |            |            |            | SC         | DKTHTCPPCP | APELLGGPSV | FLFPPKPKDT | LMISRTPEVT | CVVVDVSHED | PEVKFNWYVD |
| <b>AspN</b> |                 |            |            | DEPKSC     | DKTHTCPPCP | APELLGGPSV | FLFPPKPKDT | LMISRTPEVT | CVVVDVSHED | PEVKFNWYV  |            |
| <b>301</b>  | <b>Sequence</b> | GVEVHNAKTK | PREEQYNSTY | RVVSVLTVLH | QDWLNGKEYK | CKVSNKALPA | PIEKTISKAK | GQPREPQVYT | LPPSREEMTK | NQVSLTCLVK | GFYPSDIAVE |
|             | <b>Trypsin</b>  | GVEVHNAKTK | PR         | VVSVLTVLH  | QDWLNGKEYK | CKVSNKALPA | PIEKTISKAK | GQPREPQVYT | LPPSREEMTK | NQVSLTCLVK | GFYPSDIAVE |
|             | <b>Deg+Try</b>  | GVEVHNAKTK | PREEQYNSTY | RVVSVLTVLH | QDWLNGK    | CKVSNKALPA | PIEKTISKAK | GQPREPQVYT | LPPSREEMTK | NQVSLTCLVK | GFYPSDIAVE |
|             | <b>LysC</b>     | GVEVHNAK   |            |            |            | ALPA       | PIEK       | GQPREPQVYT | LPPSREEMTK | NQVSLTCLVK | GFYPSDIAVE |
| <b>AspN</b> |                 |            |            |            |            |            |            |            |            | DIAVE      |            |
| <b>401</b>  | <b>Sequence</b> | WESNGQPENN | YKTTTPVLDS | DGSFFLYSKL | TVDKSRWQQG | NVFSQSVHME | ALHNHYTQKS | LSLSPGK    |            |            |            |
|             | <b>Trypsin</b>  | WESNGQPENN | YKTTTPVLDS | DGSFFLYSKL | TVDKSRWQQG | NVFSQSVHME | ALHNHYTQK  | LSLSPG     |            |            |            |
|             | <b>Deg+Try</b>  | WESNGQPENN | YKTTTPVLDS | DGSFFLYSKL | TVDK WQQG  | NVFSQSVHME | ALHNHYTQK  | LSLSPG     |            |            |            |
|             | <b>LysC</b>     | WESNGQPENN | YKTTTPVLDS | DGSFFLYSK  | SRWQQG     | NVFSQSVHME | ALHNHYTQK  |            |            |            |            |
| <b>AspN</b> | WESNGQPENN      | YKTTTPVLDS | DGSFFLYSKL | TV         |            |            |            |            |            |            |            |

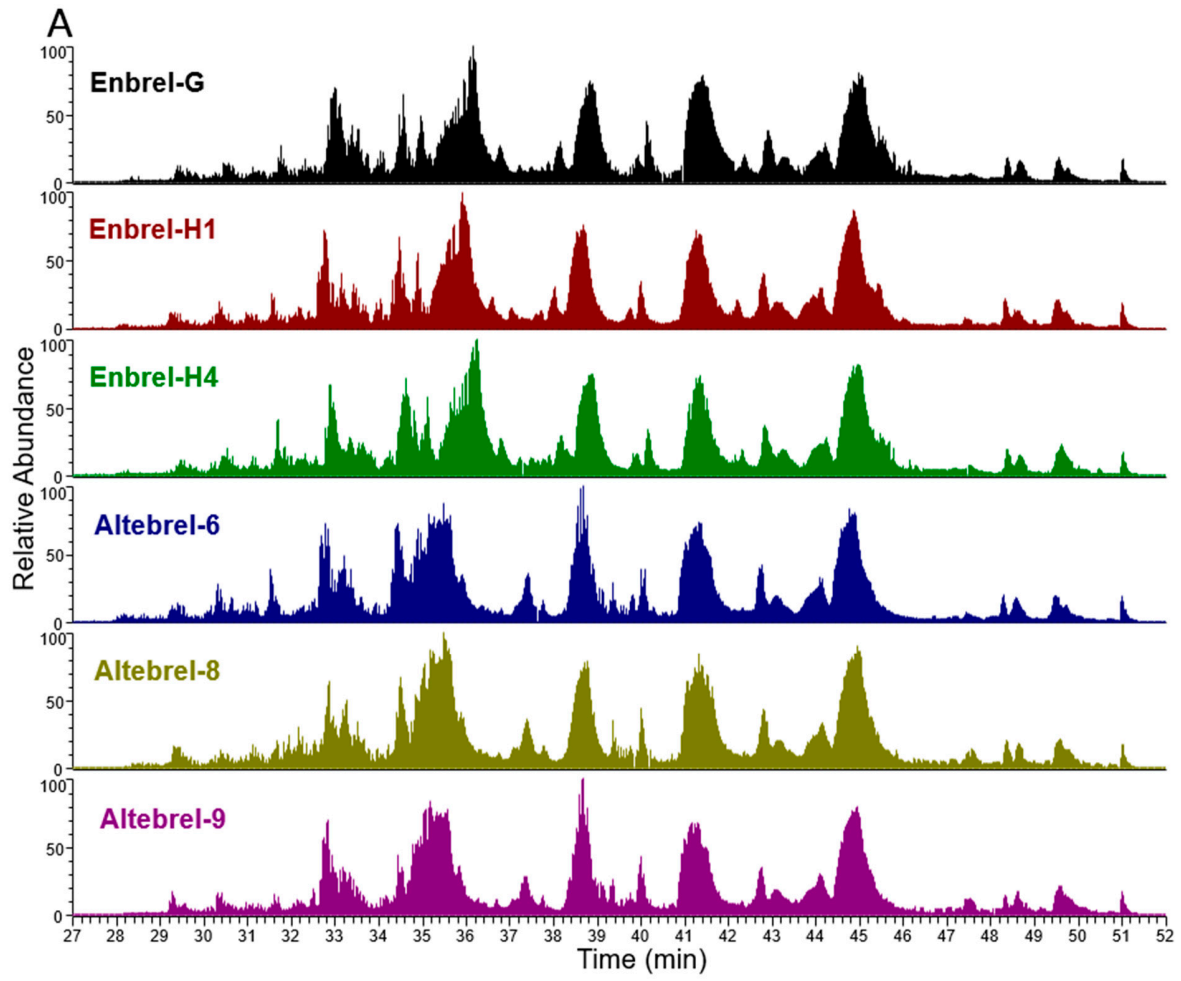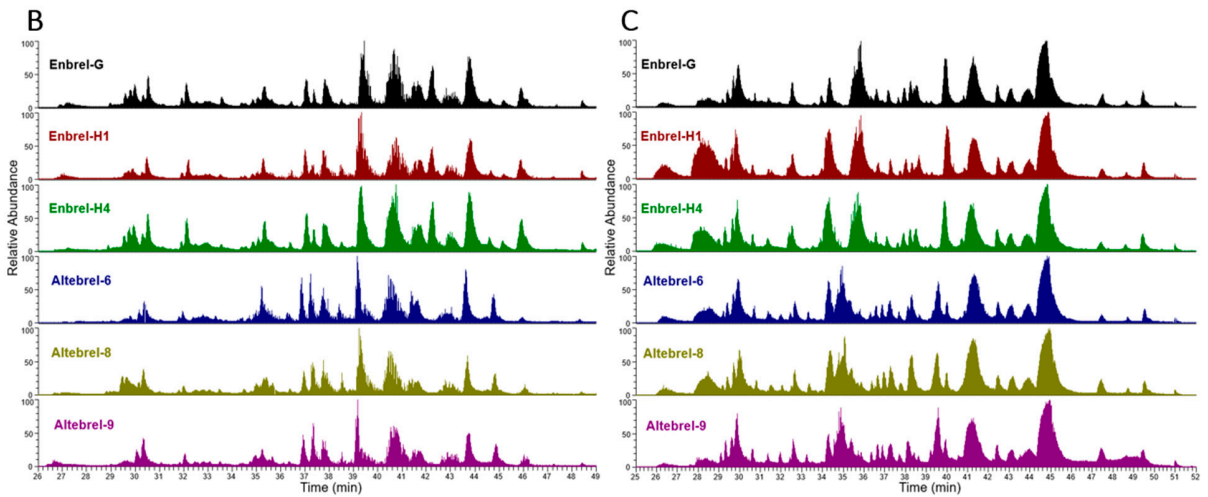

Figure S3: TICs of different etanercept digested by A) trypsin B) AspN and C) LysC.

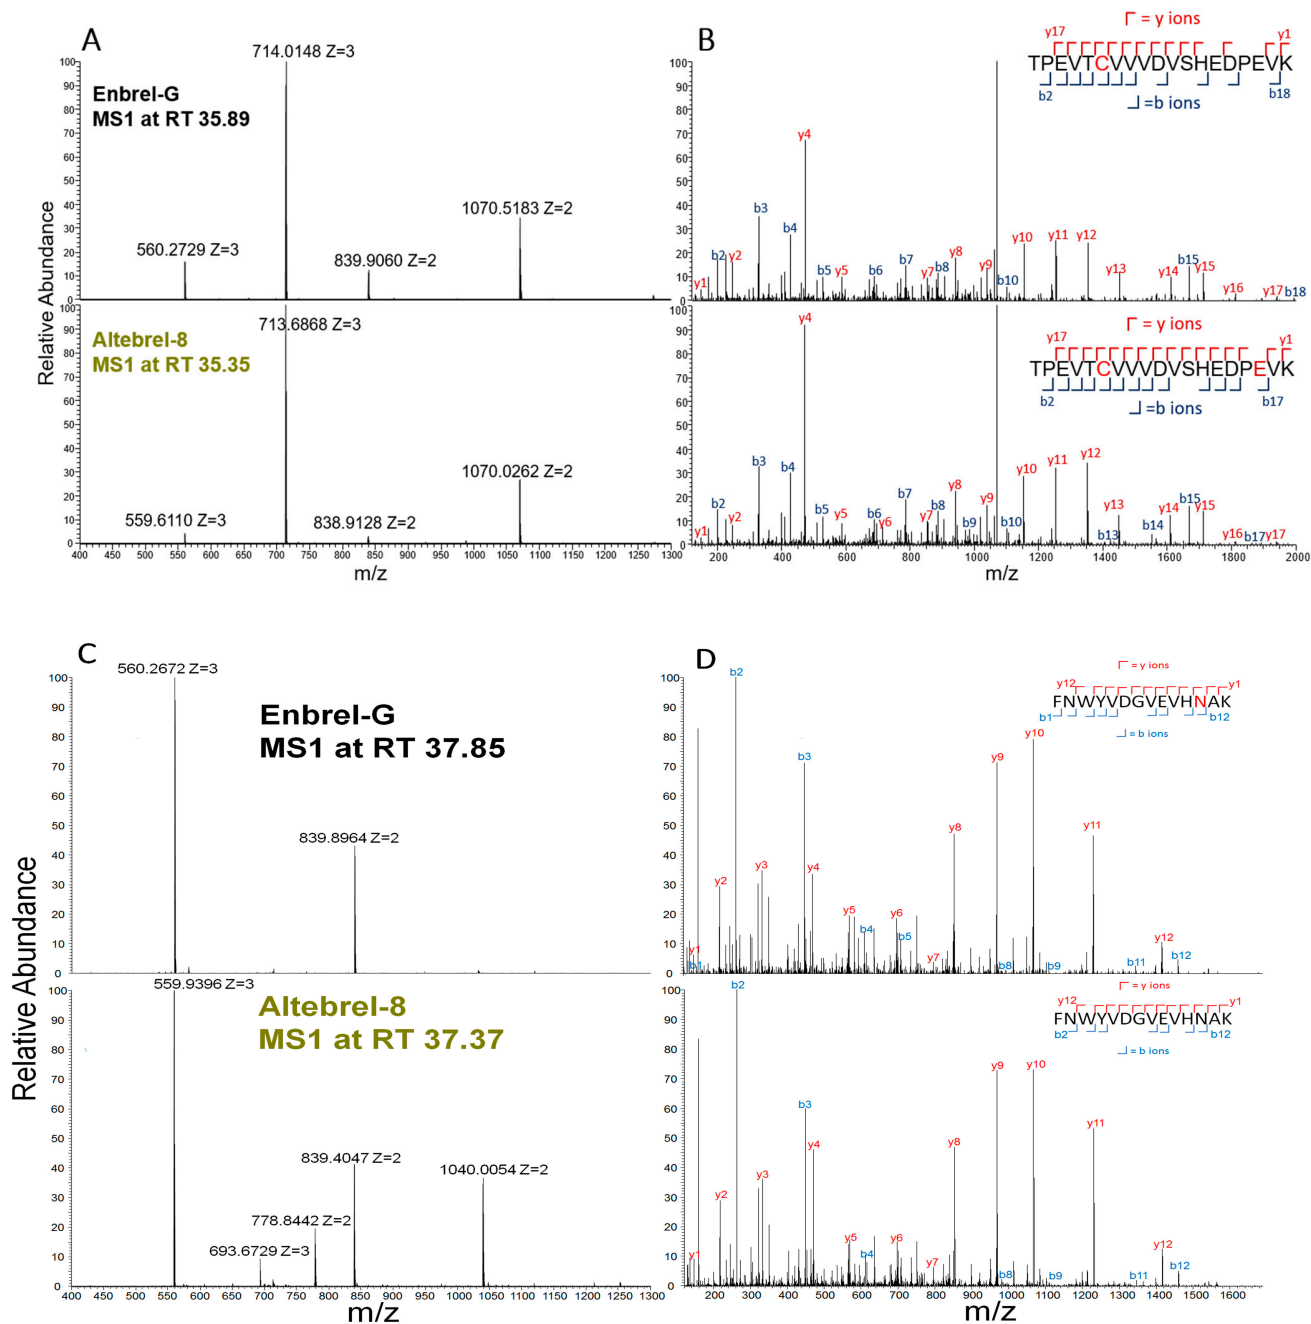

**Figure S4:** A) Full MS1 spectra of the (276)TPEVTCVVVDVSHEDPEVK(294) peptide in Enbrel-G and Altebrel-8. The peaks with the  $m/z$  values of 714.0148 and 1070.5183 are triply and doubly charged states of the precursor ion in Enbrel-G whereas the peaks with the values of 713.6868 and 1070.0262 are the ones in Altebrel-8. B) MS2 fragment spectra of the non-modified and amidated peptide at glutamic acid 292 with the assigned fragments. Because of the reduction and alkylation, the cysteine 281 is carbamidomethylated in both samples. C) Full MS1 spectra of the (295)FNWYVDGVEVHNAK(308) peptide in Enbrel-G and Altebrel-8. The peaks with the  $m/z$  of 560.2672 and 839.8964 are triply and doubly charged states of the precursor ion in Enbrel-G whereas the peaks with the values of 559.9396 and 839.4047 are the ones in Altebrel-8. D) MS2 fragment spectra of the non-modified and deamidated peptide at Asparagine 306 with the assigned fragments.

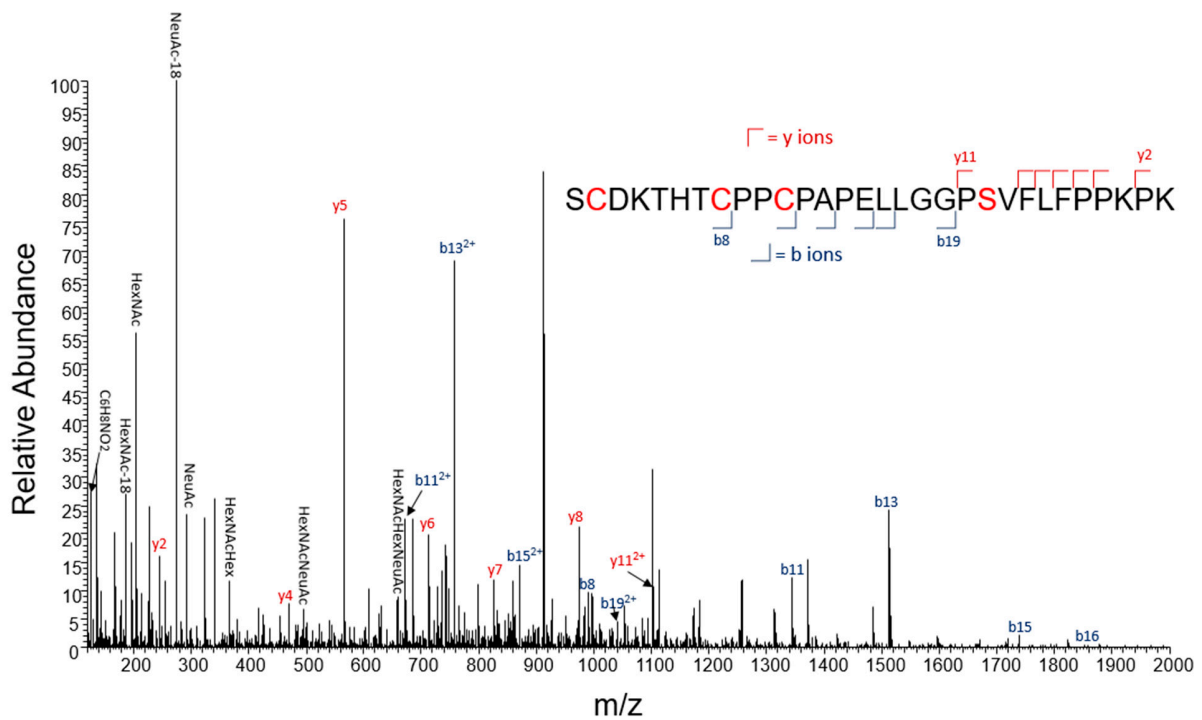

**Figure S5:** Fragment spectrum of the glycopeptide containing the O-glycosylation site at O5 peptide with following the oxonium fragment ions (labeled by the full name) at MS2 level. Matched oxonium fragments y and b ions can be seen which indicate the O-glycosylation at serine 259. Oxonium fragment ions with high peak intensities make the identification of the glycopeptide sequence challenging. The attached O-glycan was HexNAcHexNeuAc here. Cysteines are carbamidomethylated.

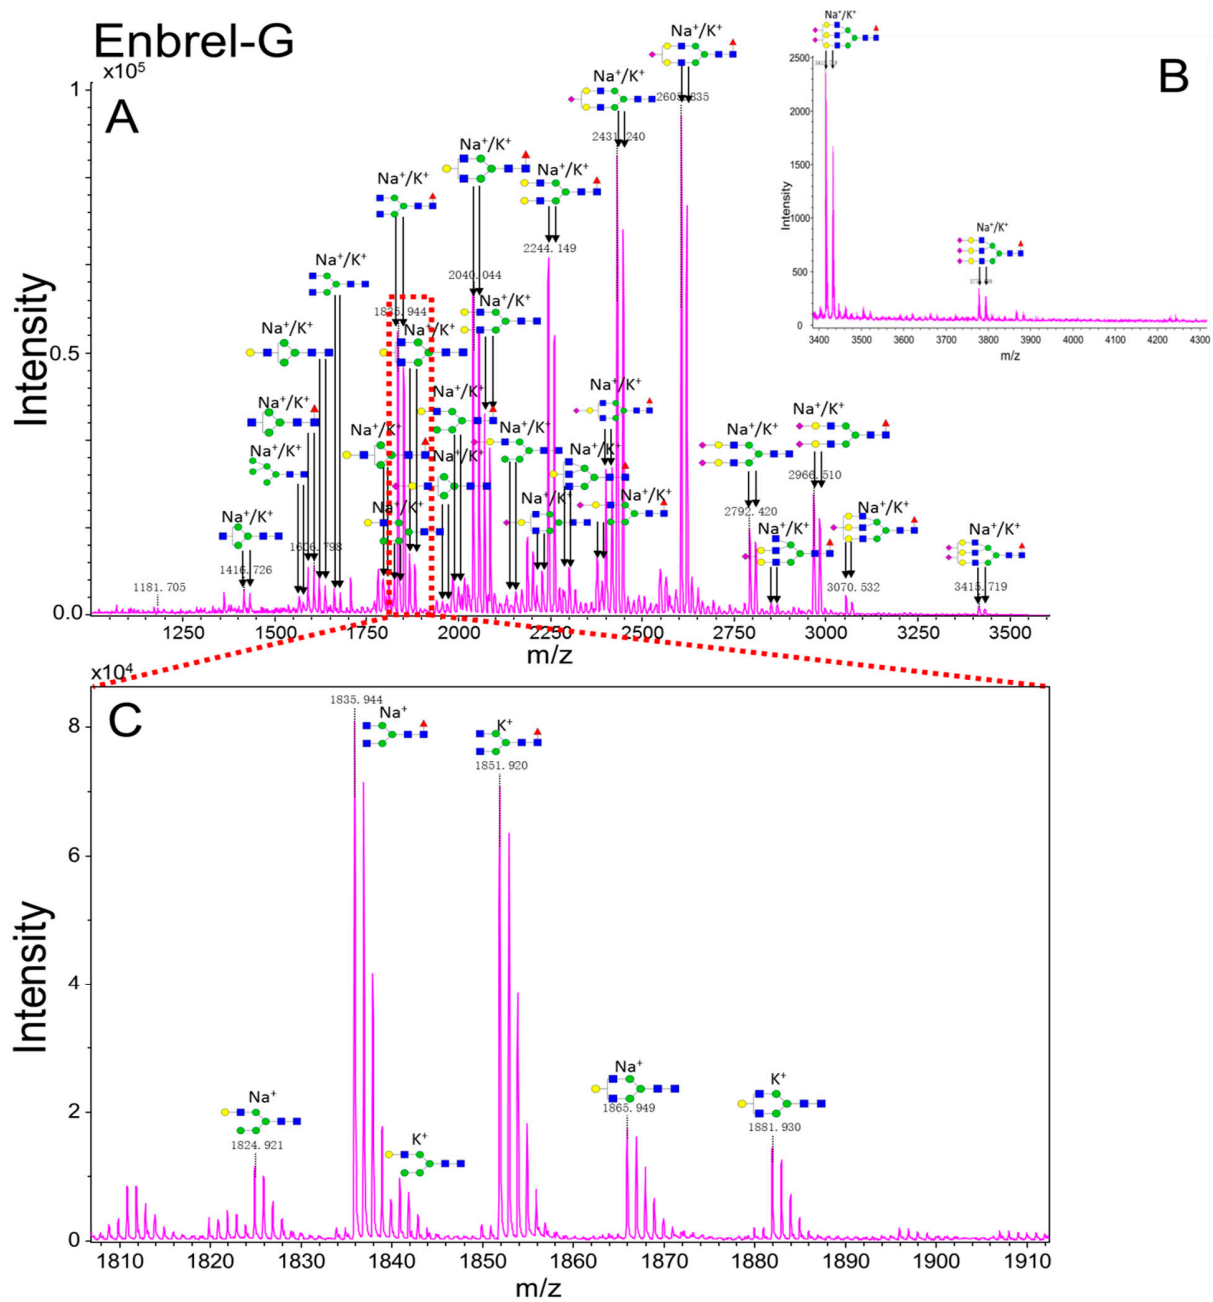

**Figure S6:** MALDI-MS mass spectrum of permethylated N-glycans released from Enbrel-G. Mass spectrum A and B were the measurement of global permethylated N-glycans, in which each N-glycan was seen with sodium and potassium adduct as one pair; Mass spectrum C is the enlarged region representing the area from  $m/z$  1810 to  $m/z$  1910. The signals correspond to  $\text{GlcNAc}_3\text{Man}_4\text{Gal}_1$ ,  $\text{GlcNAc}_4\text{Man}_3\text{Fuc}_1$  and  $\text{GlcNAc}_4\text{Man}_3\text{Gal}_1$  N-glycans.

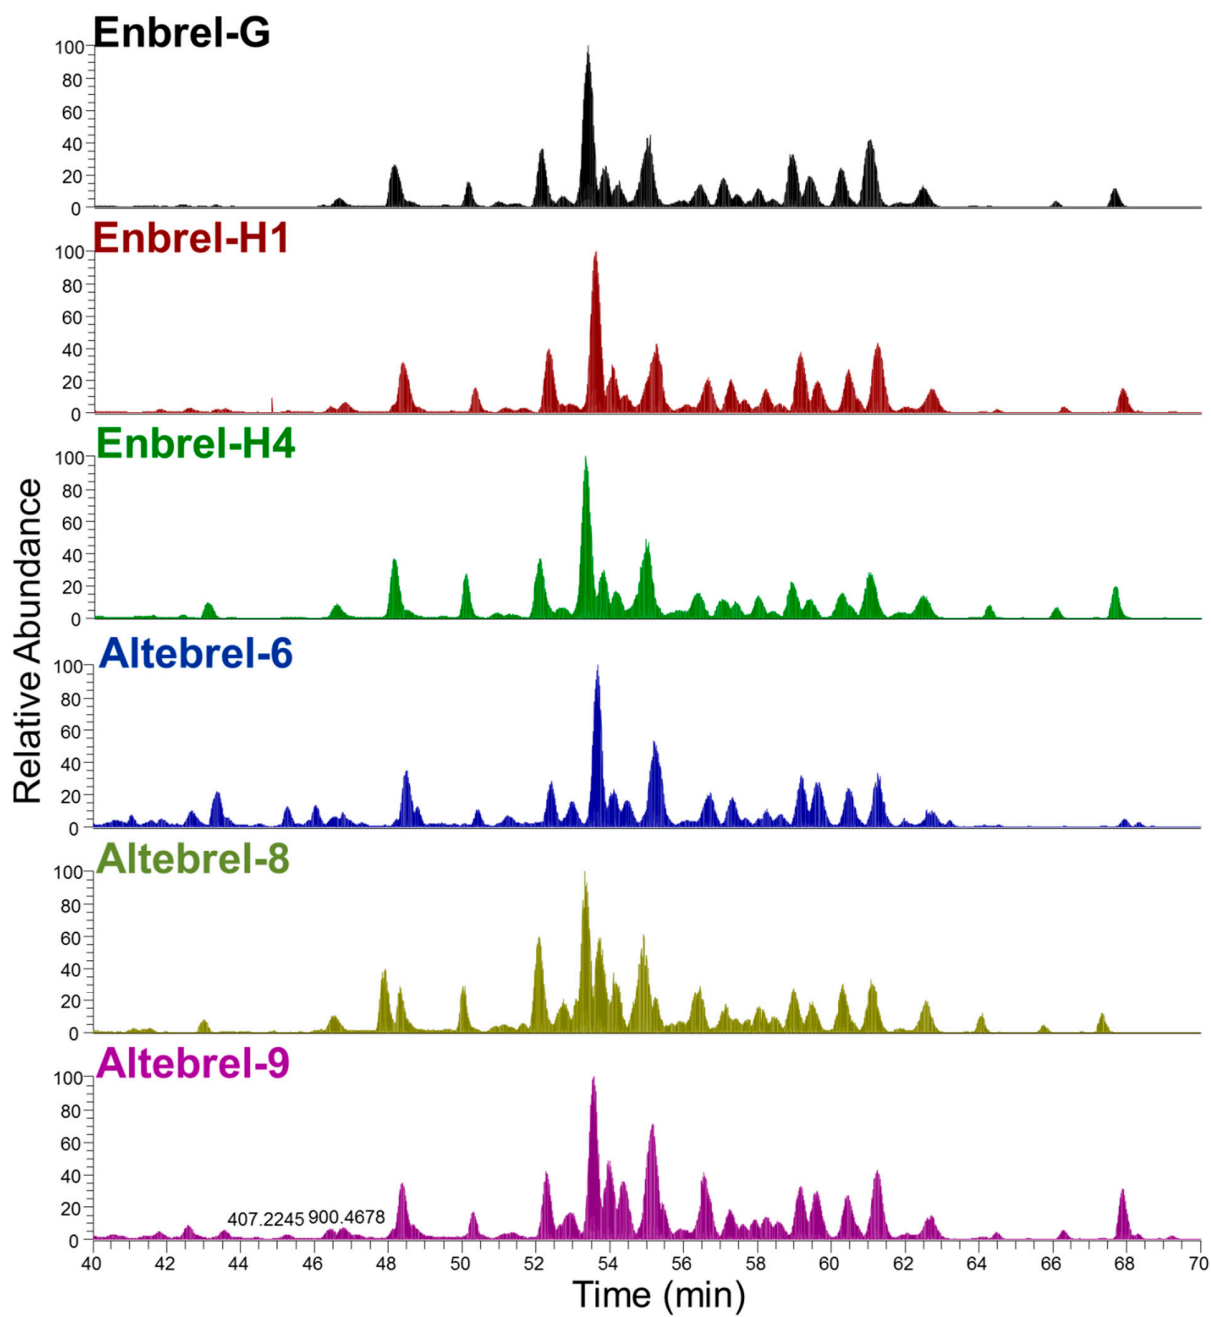

**Figure S7:** BPCs of permethylated N-glycans derived from different etanercept samples from two vendors.

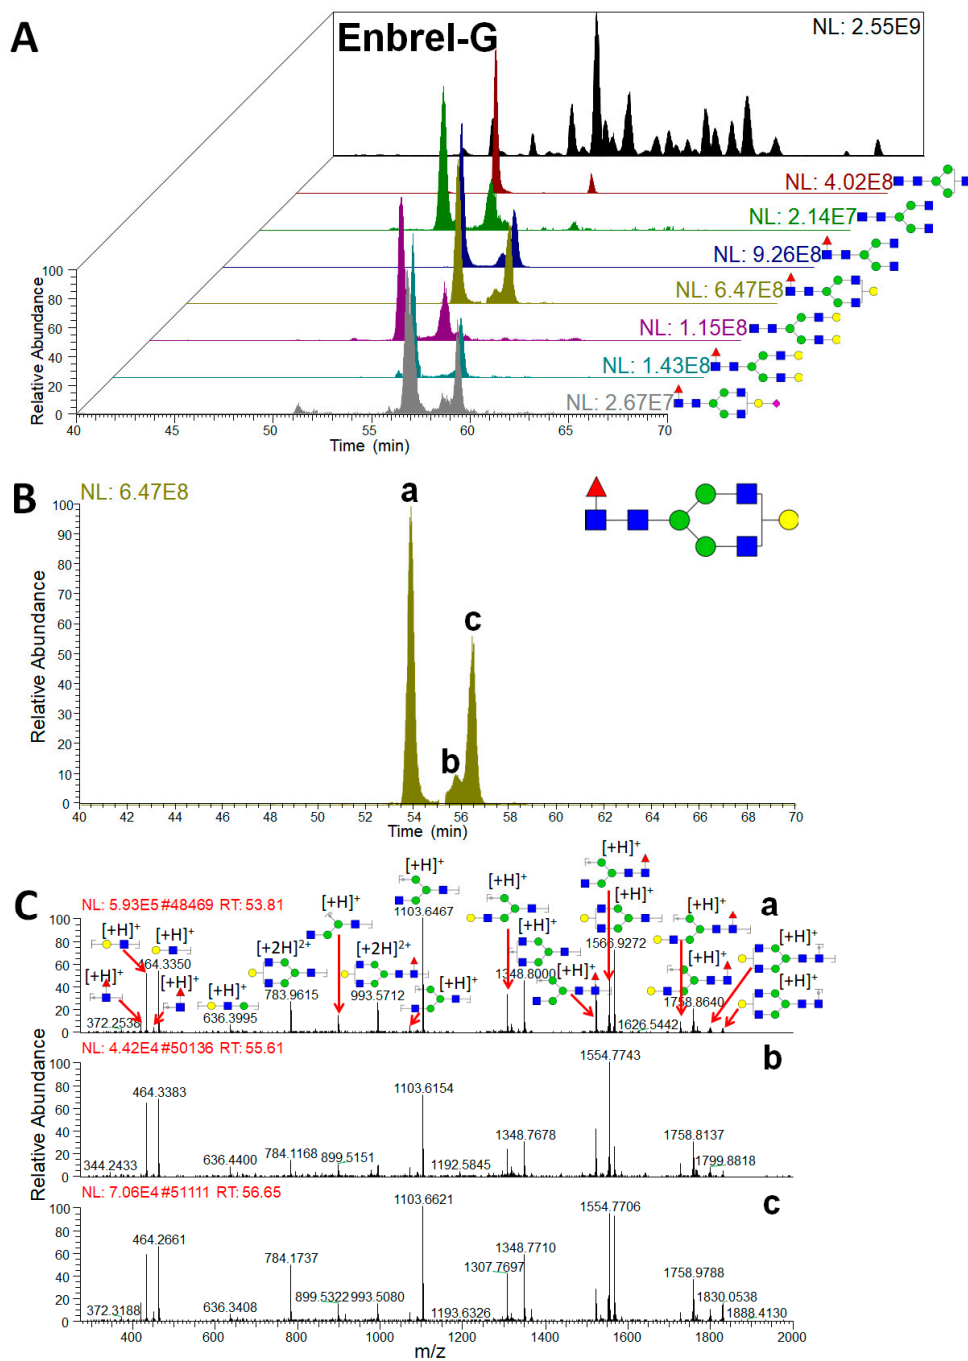

**Figure S8:** Chromatograms and spectra from N-glycans from Enbrel-G representing different isomers. (A) XICs of several isomeric N-glycans showed different retention times which were related to the size of the N-glycan structures, attached fucose and sialic acid content. (B) XIC of GlcNAc3Man3Gal1Fuc1 showed different isomeric structures as a, b and c. (C) The detailed fragment illustration for each structure of the N-glycan composition as GlcNAc3Man3Gal1Fuc1. The fragment spectra in parts b and c have the same annotation with the part a, therefore all signals belong to the same fragments.



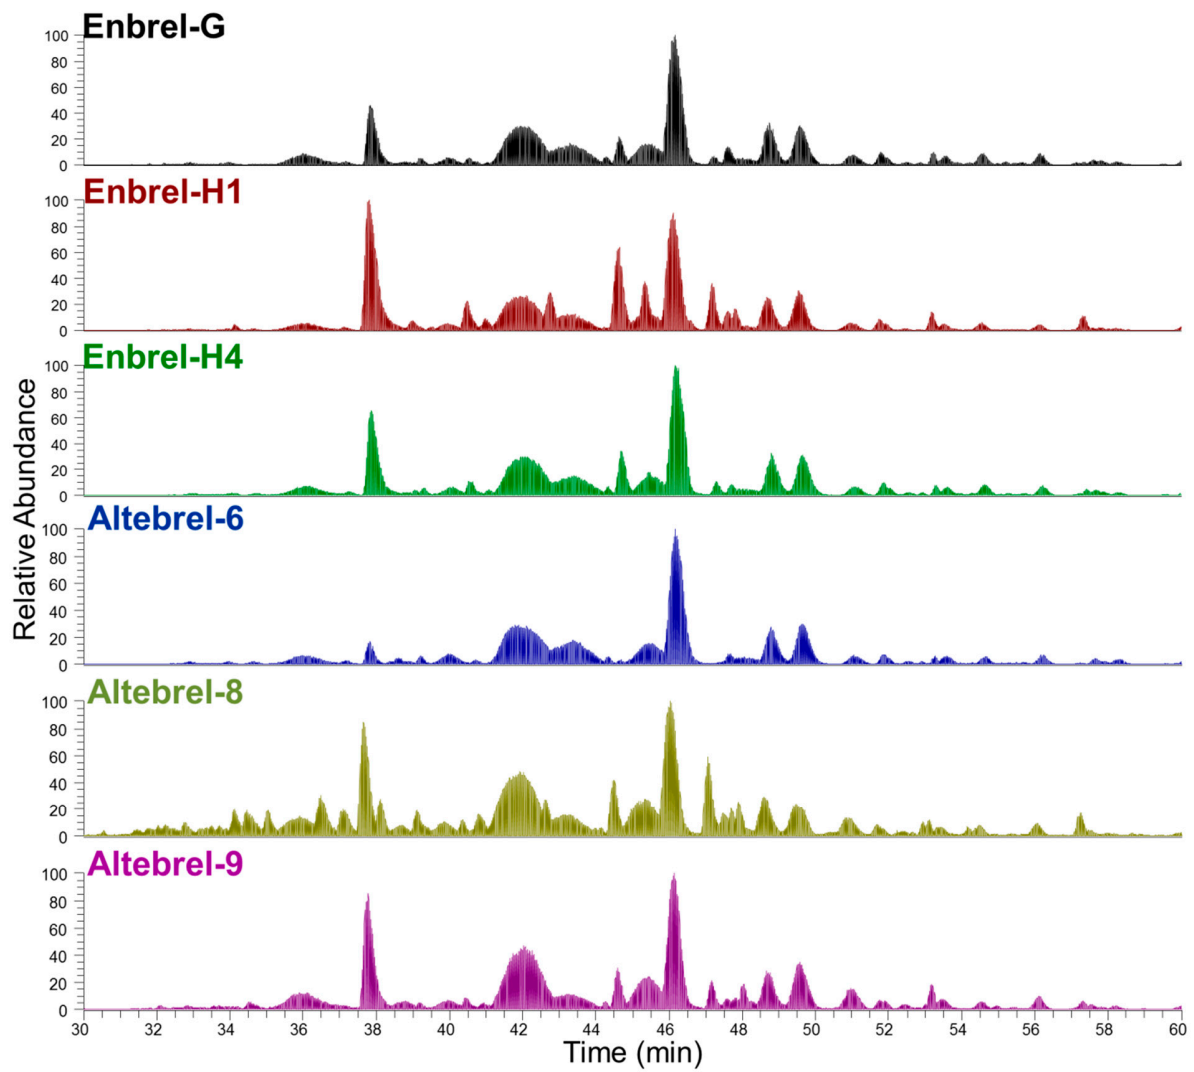

Figure S9: BPCs of O-glycans from different vendors.

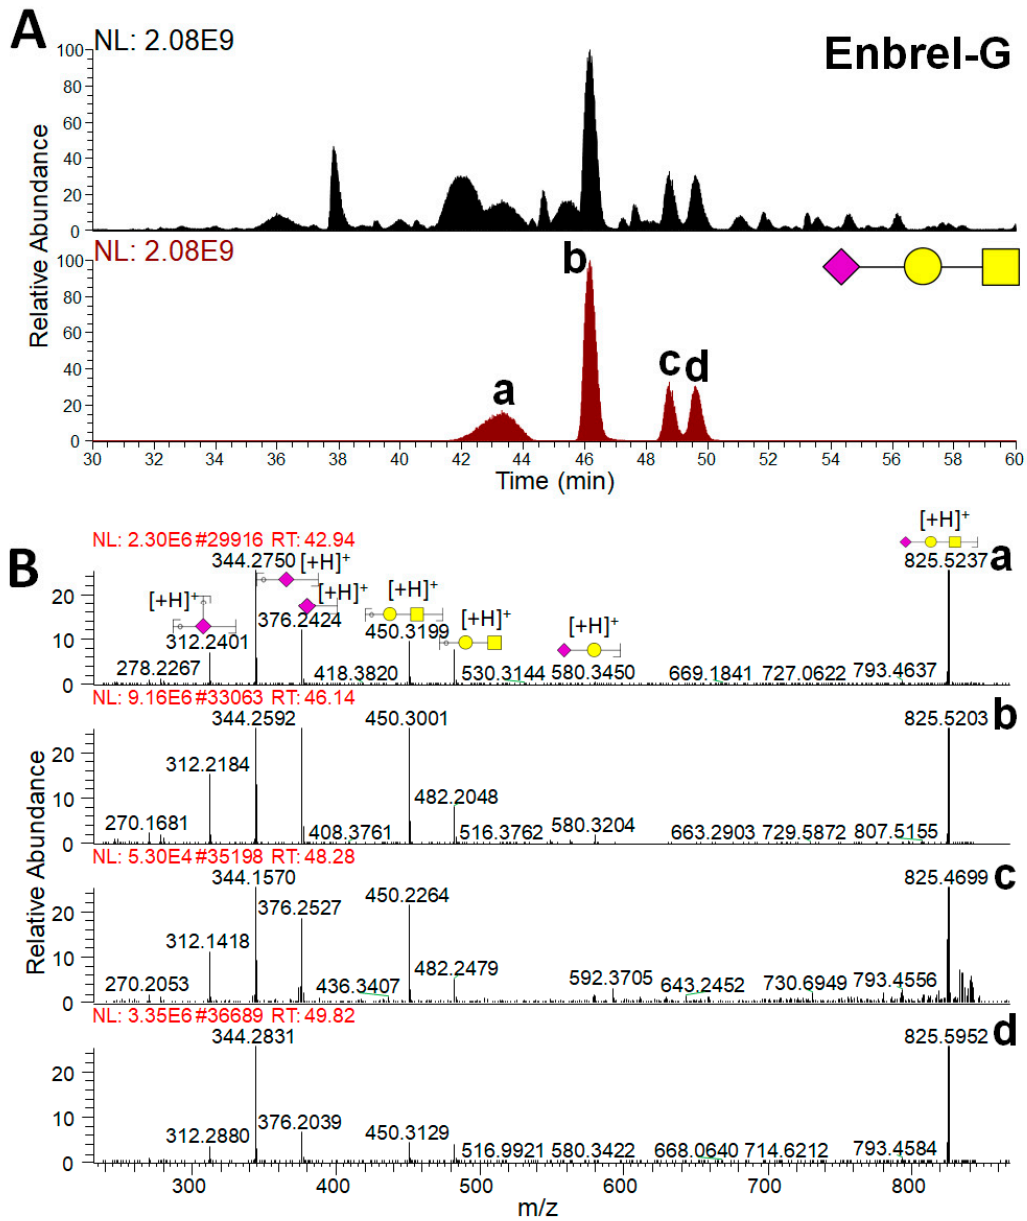

**Figure S10:** Chromatograms and spectra of O-glycans from Enbrel-G showing different isomers. (A) XIC of GalNAc1Gal1NeuAc1 for the isomeric structures as a, b, c and d. (B) Fragment spectra of isomers of the O-glycan (GalNAc1Gal1NeuAc1). The fragment ions at  $m/z$  450.3199 and 580.3450 in the MS2 spectrum a and  $m/z$  482.2048 in MS2 spectrum b confirmed the linear structure; above fragments also existed in spectra c and d with the same annotation.

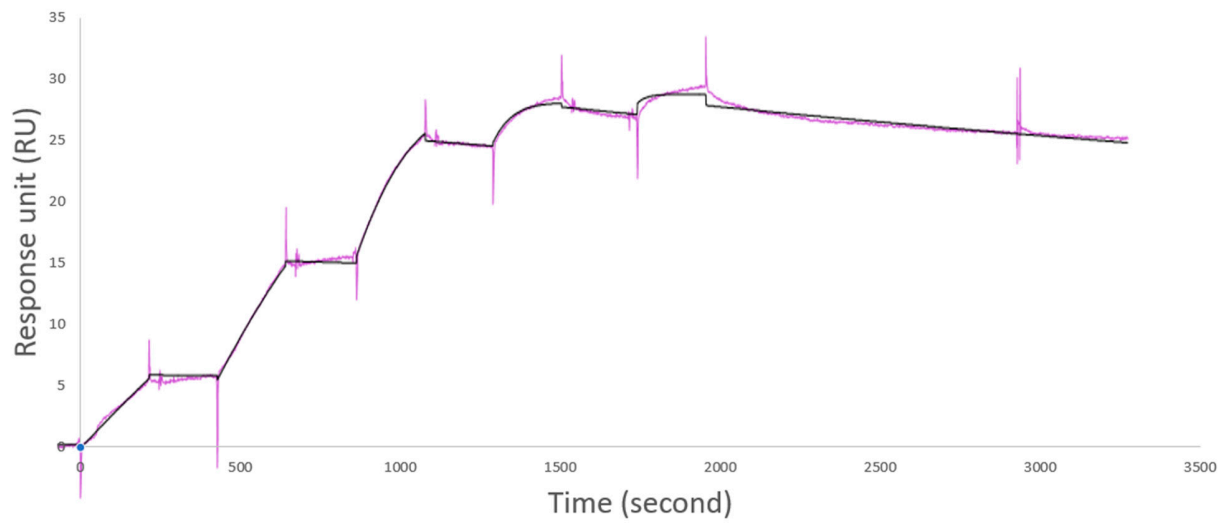

**Figure S11:** Single cycle kinetics graph of Altebrel-8 with the fitted model. In the association phase, five increasing concentrations of TNF $\alpha$  pass the chip surface which contains captured etanercept by anti-human IgG antibody. This results in an increasing level of RU. In the dissociation phase, HBS-EP buffer will pass and detach the bound TNF $\alpha$  from etanercept.

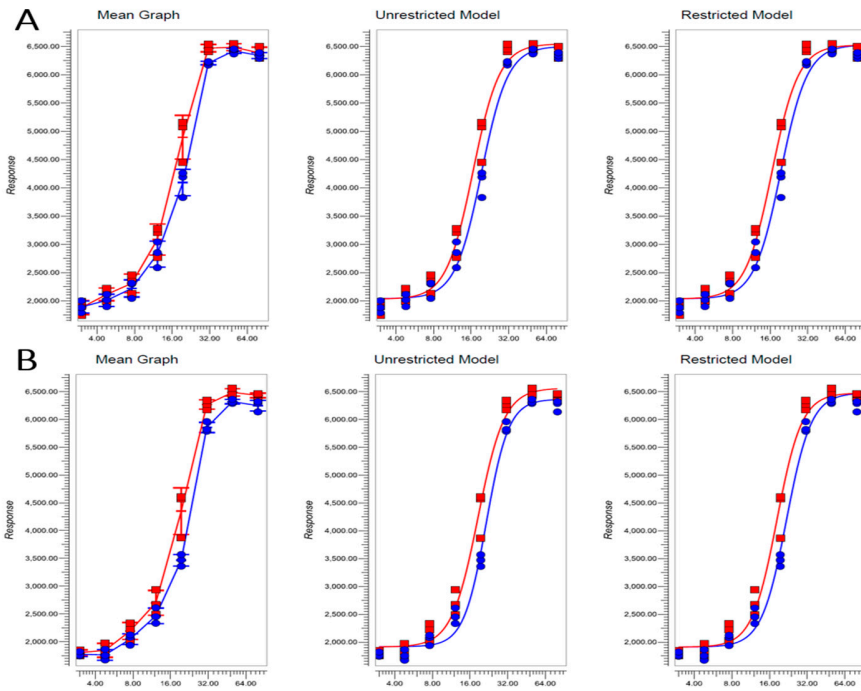

**Figure S12:** Dose-response curves of A) Control Enbrel-H1 and B) Control Altebrel-8 versus the in-house reference standard.

**Table S1:** List of observed modifications in etanercept. Modified amino acids are bolded and underlined in the sequence. Lack of lysine and leucine in C-terminal and N-terminal ends are shown by (-)

| Modification                   | Modified amino acid          | Mass shift | Exemplary peptide               |
|--------------------------------|------------------------------|------------|---------------------------------|
| Formation of pyroglutamic acid | Glu                          | -18.0106   | <u>EPQVYTLPPSR</u>              |
| Dioxidation                    | Trp                          | +31.9898   | FN <u>WY</u> VDGVEVHNAK         |
| Oxidation                      | Met                          | +15.9949   | DTL <u>M</u> ISR                |
| Carbamylation                  | Lys, Met, Peptide N-terminus | +43.0058   | EEMT <u>K</u> NQVSLTCLVK        |
| Amidation                      | Asp, Glu                     | -0.984     | TPEVTCVVVDVSHEDP <u>E</u> VK    |
| Deamidation                    | Asn, Gln                     | +0.984     | GFYPSDIAVEWES <u>N</u> GQPENNYK |
| C-terminal Lysine clipping     | Lack of Lys                  | -128.09497 | SLSLSPG(-)                      |
| N-terminal heterogeneity       | Lack of Leu                  | -113.08407 | (-)PAQVAFTPYAPEPGSTCR           |

**Table S2:** Identified N-glycans in Enbrel-G.

| Reference                                         | N-glycan structures                                                                 | Native Monoisotopic Mw | Permethylation Monoisotopic Mw |           | Deviation (ppm) |
|---------------------------------------------------|-------------------------------------------------------------------------------------|------------------------|--------------------------------|-----------|-----------------|
|                                                   |                                                                                     |                        | Experiment                     | Theory    |                 |
| Confirmation of N-glycans previously reported [6] | 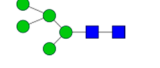 | 1234.4334              | 1556.7920                      | 1556.7945 | -1.6059         |
|                                                   |  | 1259.4651              | 1567.8078                      | 1567.8094 | -1.0205         |
|                                                   |  | 1316.4865              | 1638.8456                      | 1638.8476 | -1.2204         |
|                                                   |  | 1462.5444              | 1812.9346                      | 1812.9369 | -1.2687         |
|                                                   |  | 1478.5394              | 1842.9446                      | 1842.9476 | -1.6278         |
|                                                   |  | 1583.5707              | 1976.0073                      | 1976.0089 | -0.7996         |
|                                                   |  | 1624.5973              | 2017.0356                      | 2017.0369 | -0.6445         |
|                                                   |  | 1640.5922              | 2047.0442                      | 2047.0475 | -1.6121         |
|                                                   |  | 1786.6501              | 2221.1334                      | 2221.1368 | -1.5308         |
|                                                   |  | 1827.6767              | 2262.1607                      | 2262.1618 | -0.4686         |
|                                                   |  | 1874.6661              | 2337.1811                      | 2337.1826 | -0.6204         |

Table S2. Cont.

|                            |                                                                                     |           |           |           |         |
|----------------------------|-------------------------------------------------------------------------------------|-----------|-----------|-----------|---------|
|                            | 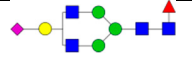   | 1915.6927 | 2378.2074 | 2378.2108 | -1.4297 |
|                            |    | 1931.6876 | 2408.2192 | 2408.2214 | -0.9135 |
|                            |    | 2077.7455 | 2582.3084 | 2582.3107 | -0.8907 |
|                            |    | 2222.7830 | 2769.3916 | 2769.3953 | -1.3360 |
|                            |    | 2368.8409 | 2943.4812 | 2943.4846 | -1.1551 |
|                            |    | 2442.8777 | 3031.536  | 3031.5371 | -0.3629 |
| Newly identified N-glycans |    | 1113.4072 | 1393.7196 | 1393.7202 | -0.4305 |
|                            |    | 1275.4600 | 1597.8182 | 1597.8199 | -1.0639 |
|                            |   | 1421.5179 | 1771.9084 | 1771.9104 | -1.1287 |
|                            |  | 1437.5128 | 1801.9191 | 1801.9197 | -0.3163 |
|                            |  | 1566.5554 | 1958.9924 | 1958.9936 | -0.6126 |
|                            |  | 1728.6082 | 2163.0913 | 2163.0934 | -0.9431 |
|                            |  | 1769.6348 | 2204.1178 | 2204.1215 | -1.6788 |
|                            |  | 2280.8249 | 2827.4334 | 2827.4352 | -0.6366 |
|                            |  | 2733.9731 | 3392.7062 | 3392.7062 | -1.4148 |
|                            |  | 3025.0686 | 3753.8814 | 3753.8824 | -0.9057 |
